# Supplementary material for: Enhancing the activity and stability of Cu2O nanorods via coupling with a NaNbO3/SnS2 heterostructure for photoelectrochemical water-splitting
Source: Royal Society of Chemistry journal article supplement (doi:10.1039/d3nj00684k), 2023-01-01

## Supporting Information

### **Enhancing the activity and stability of the Cu<sub>2</sub>O nanorods via coupling with NaNbO<sub>3</sub>/SnS<sub>2</sub> heterostructure for photoelectrochemical water splitting**

Shalini Tiwari<sup>1</sup>, Priyanka Yadav<sup>1</sup> and Ashok K. Ganguli<sup>1,2</sup>

<sup>1</sup>Department of Chemistry, Indian Institute of Technology Delhi

<sup>2</sup>Department of Materials Science and Engineering, Indian Institute of Technology Delhi  
New Delhi 110016, India

---

\* Author for correspondence

Email: [ashok@chemistry.iitd.ernet.in](mailto:ashok@chemistry.iitd.ernet.in)

**Figure S1** High-Resolution Transmission Electron Microscopy (HRTEM)

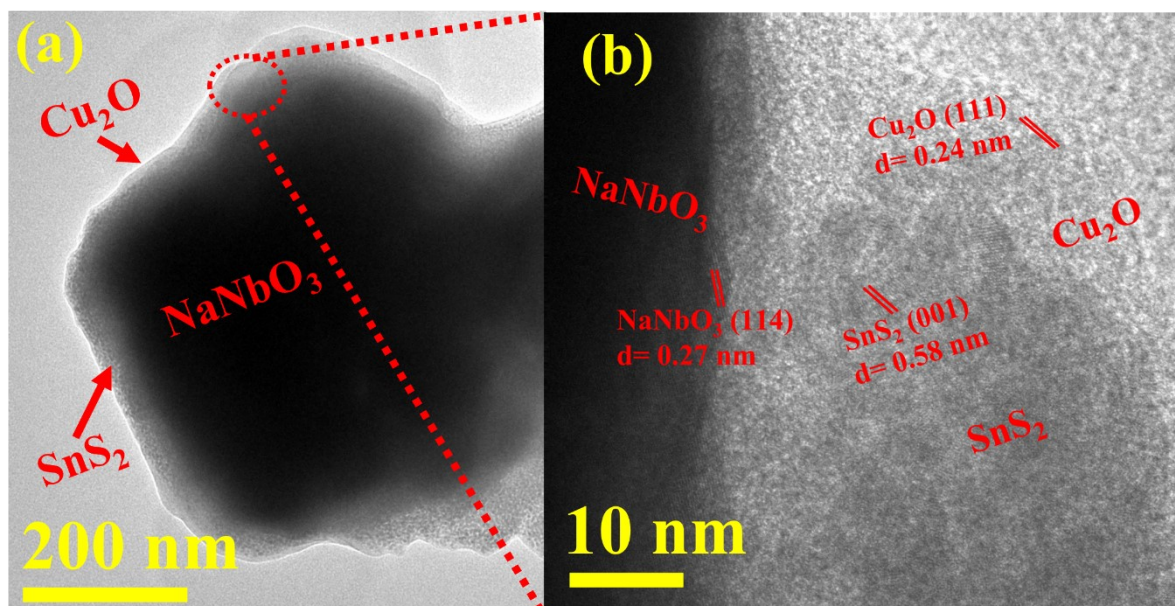

**Figure S1** (a) TEM image and (b) HRTEM image of the  $\text{NaNbO}_3/\text{SnS}_2/\text{Cu}_2\text{O}$  heterostructure.

**Table S1** Calculated conduction and valence band edge positions:

| S.No. | Material           | Valence band | Conduction Band                                      |
|-------|--------------------|--------------|------------------------------------------------------|
| S.No. | Photocatalyst      |              | Current density,<br>light-dark (mA/cm <sup>2</sup> ) |
| 1.    | NaNbO <sub>3</sub> | 2.98 eV      | -0.48 eV                                             |
| 2.    | SnS <sub>2</sub>   | 1.50 eV      | - 0.96 eV                                            |
| 3.    | Cu <sub>2</sub> O  | 0.30 eV      | -1.75 eV                                             |

S2:  
Calculation

of the electron affinity potential of the semiconductor materials by the following formula:

$$X = 0.5 (E_{EA} + E_{ion})$$

Here,  $E_{EA}$  = Energy of electron affinity and  $E_{ion}$  = First Ionization Energy

For NaNbO<sub>3</sub>,  $X_{Na} = 3.04$  eV,  $X_{Nb} = 4.035$  eV and  $X_O = 8.05$  eV,  $X_{NaNbO_3} = 5.73$  eV

For Cu<sub>2</sub>O,  $X_{Cu} = 2.81$  eV,  $X_O = 8.05$  eV,  $X_{Cu_2O} = 3.99$  eV

For SnS<sub>2</sub>  $X_{Sn} = 3.45$  eV,  $X_O = 8.05$  eV,  $X_{SnS_2} = 4.57$  eV

**Table S2** Calculated the difference in current density of the photocatalyst between light and dark irradiation.

|    |                                                   |      |
|----|---------------------------------------------------|------|
| 1. | $\text{NaNbO}_3/\text{SnS}_2/\text{Cu}_2\text{O}$ | 6.50 |
| 2. | $\text{NaNbO}_3/\text{SnS}_2$                     | 0.84 |
| 3. | $\text{SnS}_2$                                    | 0.35 |
| 4. | $\text{NaNbO}_3$                                  | 0.18 |
| 5. | $\text{Cu}_2\text{O}$                             | 0.13 |

**Figure S2** Linear Sweep Voltammetry plots of  $\text{NaNbO}_3/\text{SnS}_2/\text{Cu}_2\text{O}$  heterostructure.

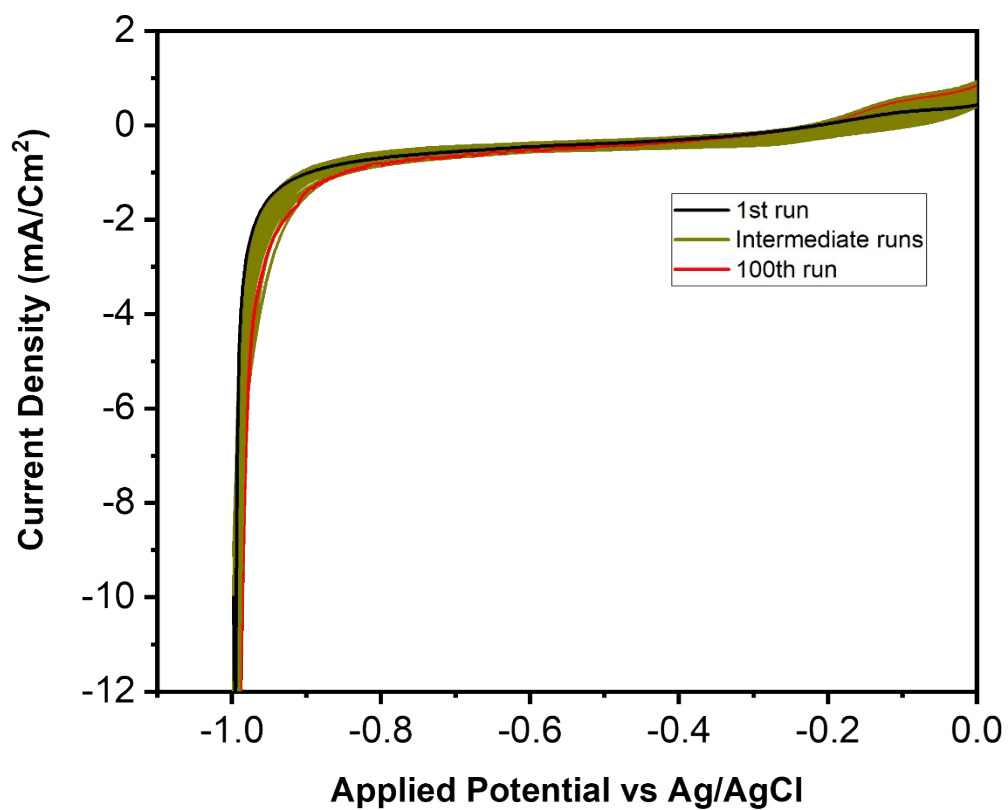

**Figure S3** Faradaic Efficiency of the photocatalyst of  $\text{NaNbO}_3/\text{SnS}_2/\text{Cu}_2\text{O}$ ,  $\text{NaNbO}_3/\text{SnS}_2$  and  $\text{Cu}_2\text{O}$ .

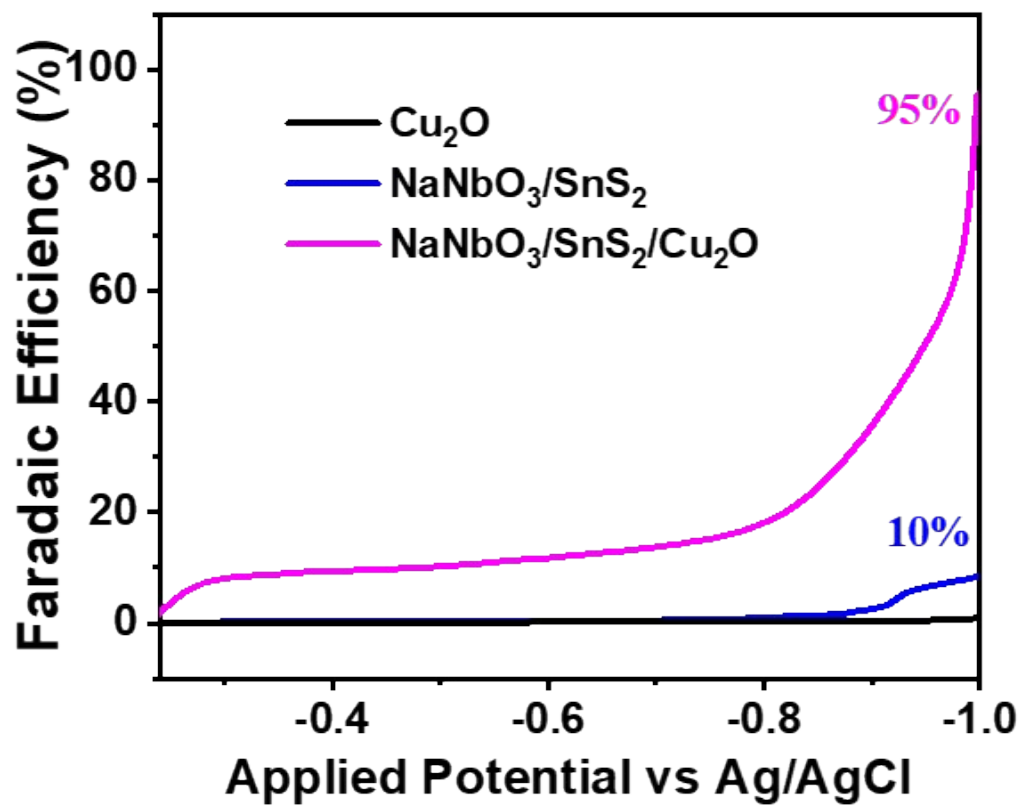

Figure S4 Mott-Schottky plot of SnS<sub>2</sub>

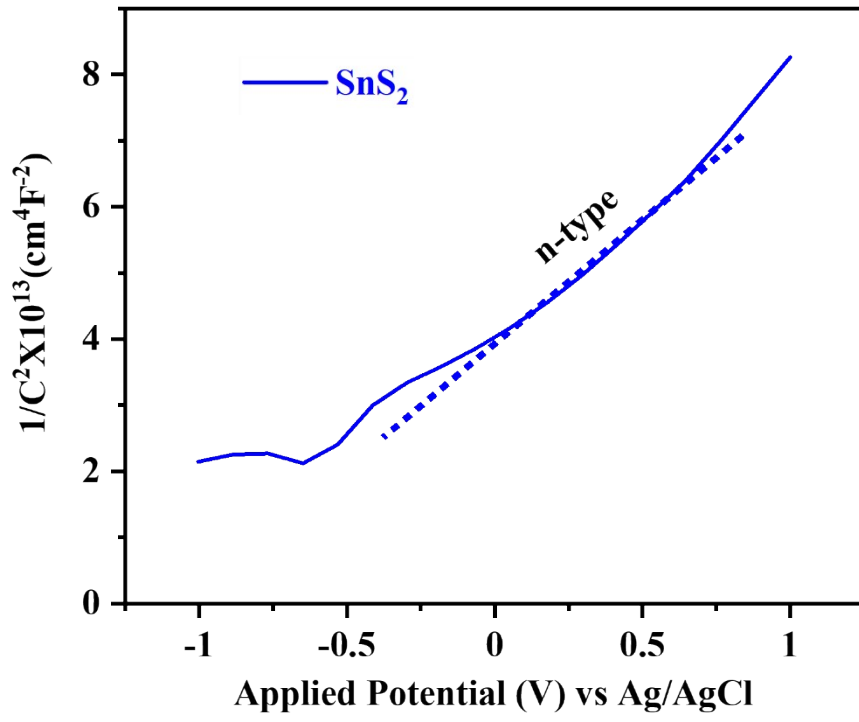

Supplement: d3nj00684k1.pdf [file d3nj00684k1.pdf]
